# Supplementary material for: A reduced graphene oxide-encapsulated phosphorus/carbon composite as a promising anode material for high-performance sodium-ion batteries
Source: Royal Society of Chemistry journal article supplement (doi:10.1039/c6ta09967j), 2017-01-01
Supplement: c6ta09967j1.pdf [file c6ta09967j1.pdf]

Supporting information:

# **Reduced Graphene Oxide-Encapsulated Phosphorus/Carbon Composite as a Promising Anode Material for High-Performance Sodium-Ion Batteries**

*Gi-Hyeok Lee<sup>a</sup>, Mi Ru Jo<sup>a</sup>, Kai Zhang<sup>a</sup>, Yong-Mook Kang<sup>\*,a</sup>*

<sup>a</sup> Department of Energy and Materials Engineering, Dongguk University-Seoul, Seoul, 100-715, Republic  
of Korea.

\* Corresponding author E-mail: Yong-Mook Kang; [dake1234@dongguk.edu](mailto:dake1234@dongguk.edu)

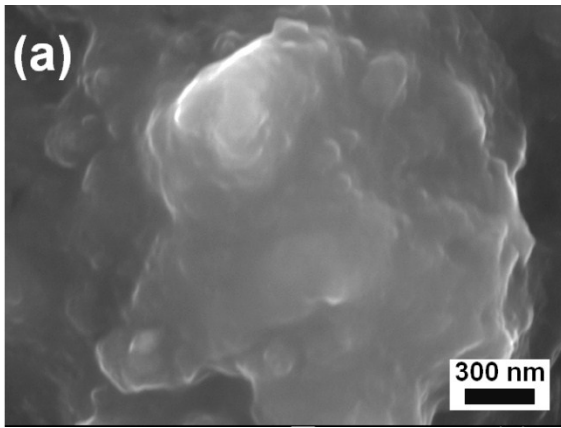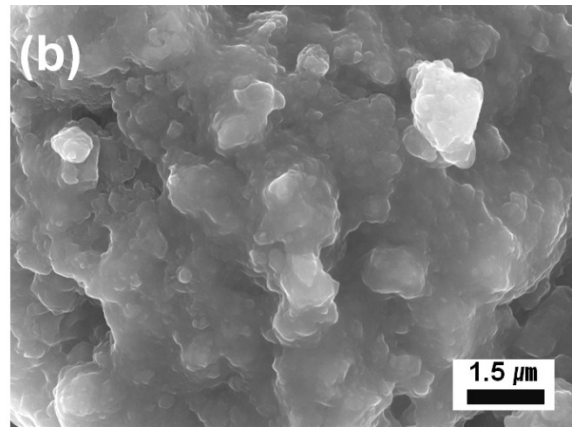

**Fig. S1** SEM images of P/C@GO in different magnifications (a) x50,000 (b) x10,000

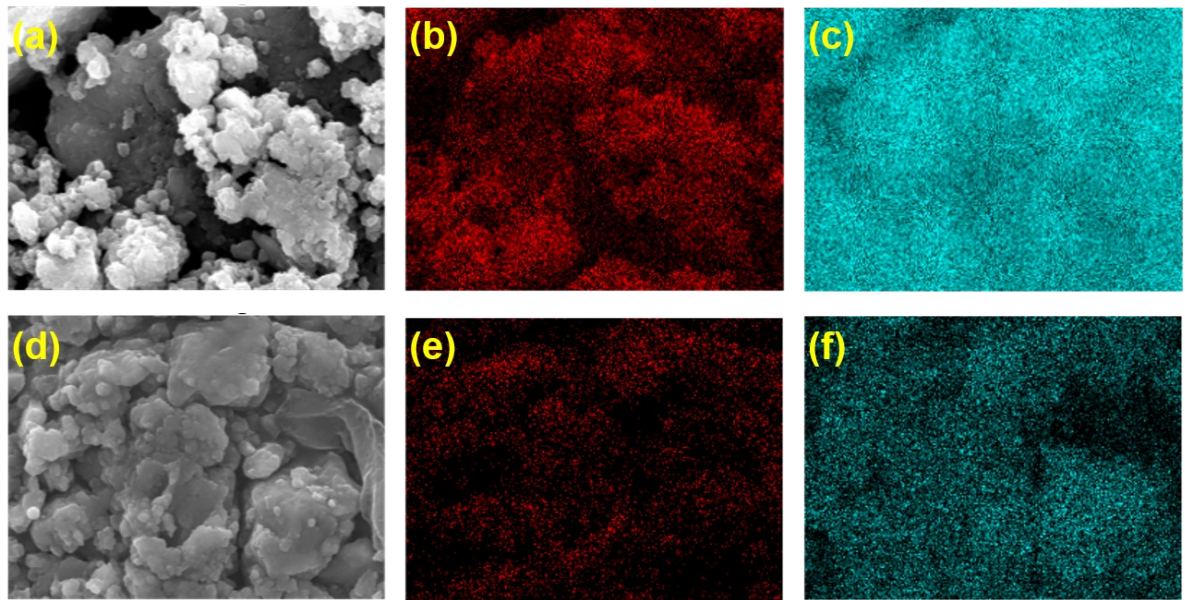

**Fig. S2** Energy dispersive X-ray spectroscopy (EDS) images of P/C composite and P/C@rGO. (a, d) SEM images. (b, e) EDS images of Phosphorus. (c, f) EDS images of Carbon.

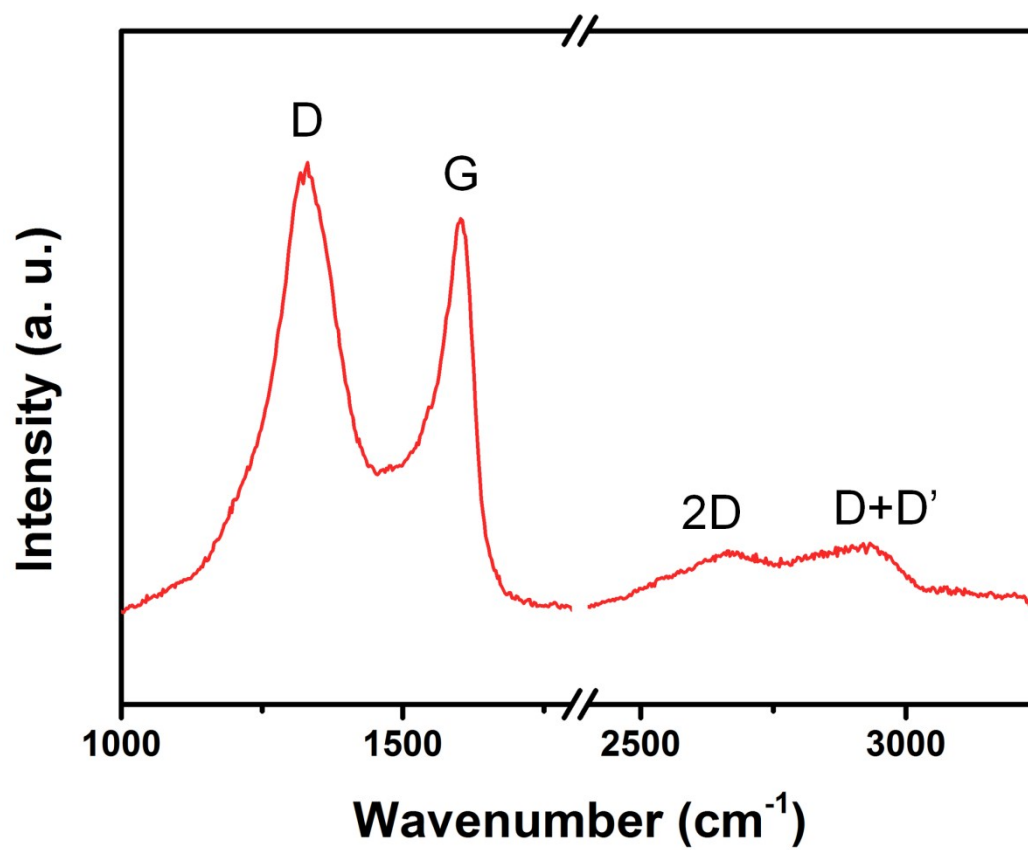

Fig. S3 Raman spectrum of P/C@rGO

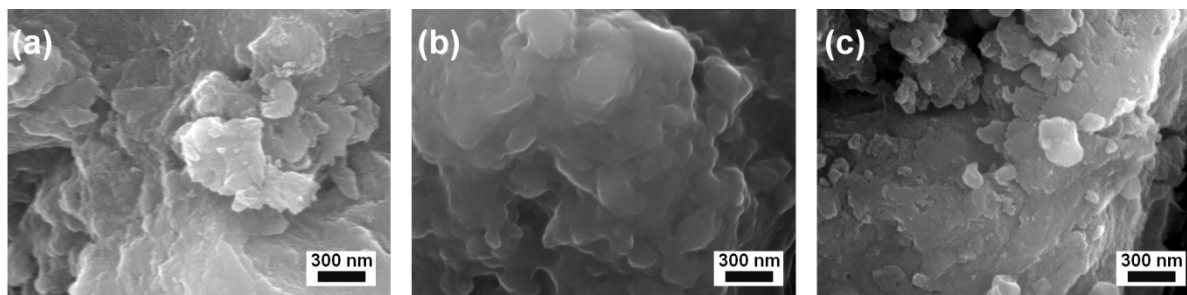

**Fig. S4** SEM images of P/C@rGO with different rGO concentrations; (a) 3.0 mg/100 mL, (b) 1.5 mg/100 mL (optimum), (c) 0.5 mg/100 mL.

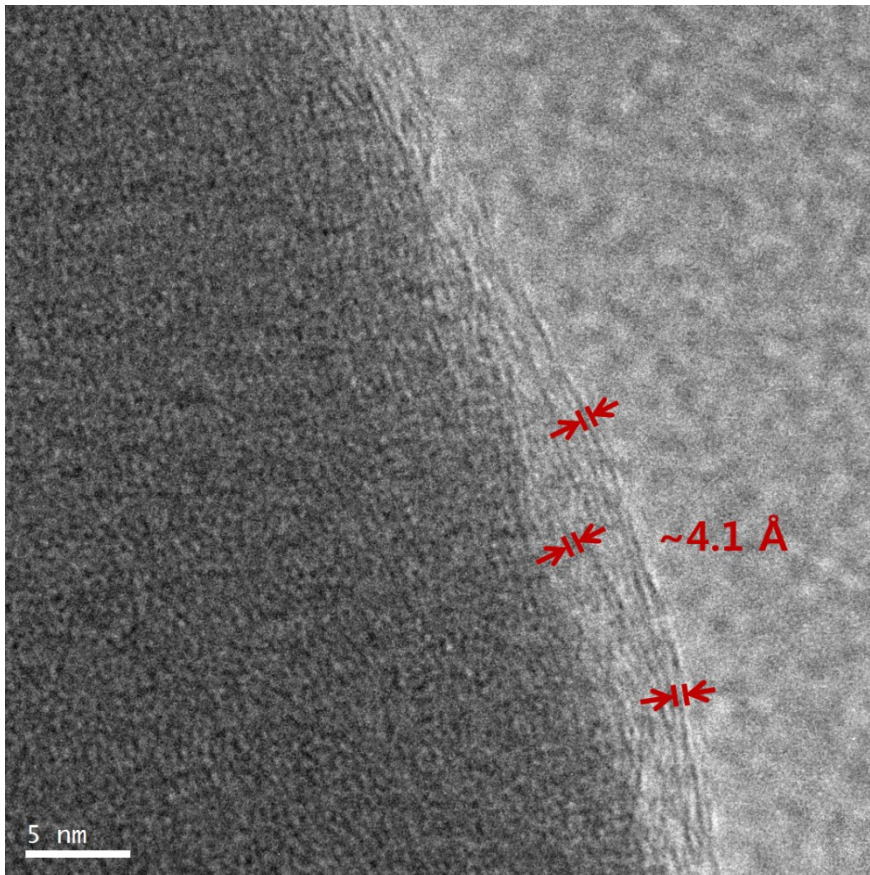

**Fig. S5** D-spacing measurement of rGO coating on P/C@rGO from HR-TEM image.

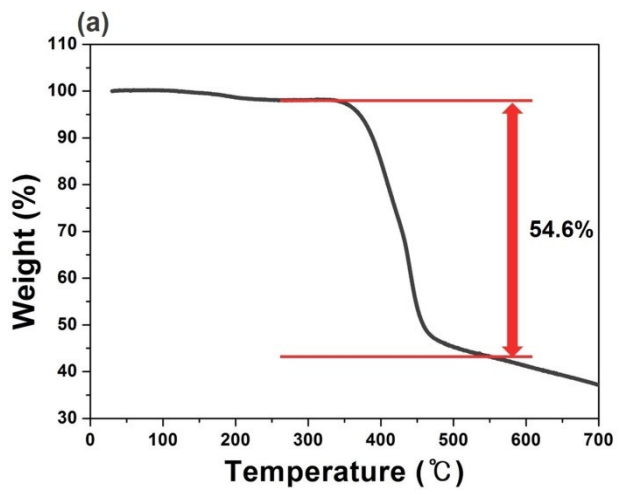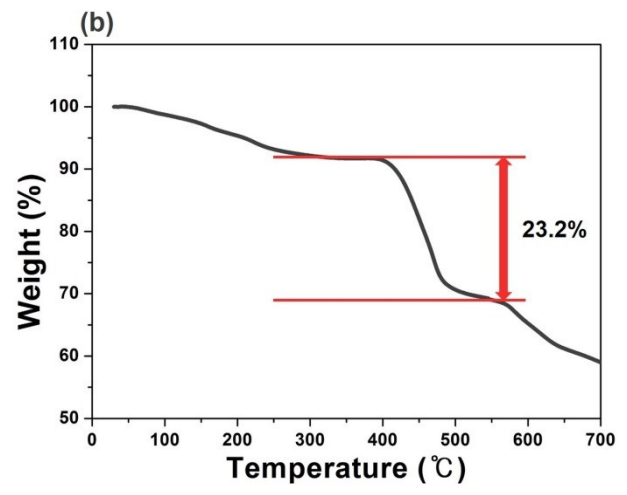

**Fig. S6** Thermogravimetric analysis (TGA) of (a) P/C composite and (b) P/C@rGO.

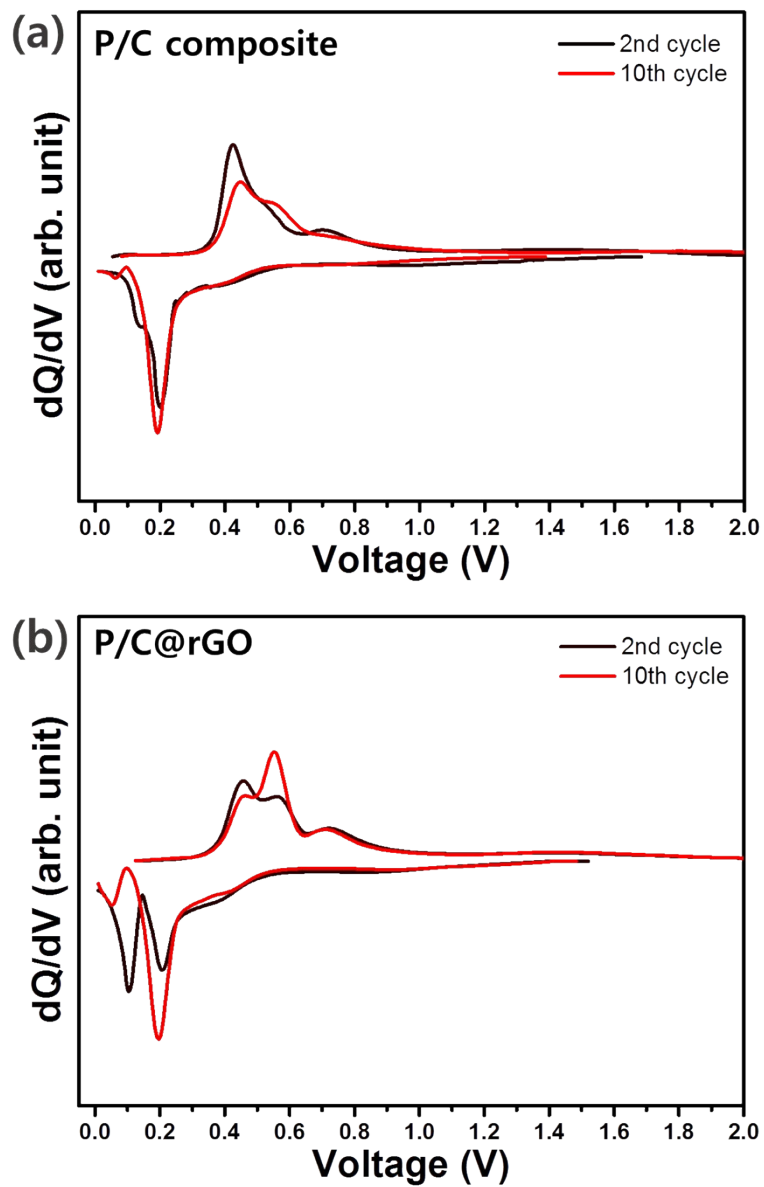

**Fig. S7**  $dQ/dV$  analysis of (a) P/C composite and (b) P/C@rGO during initial 10 cycles.



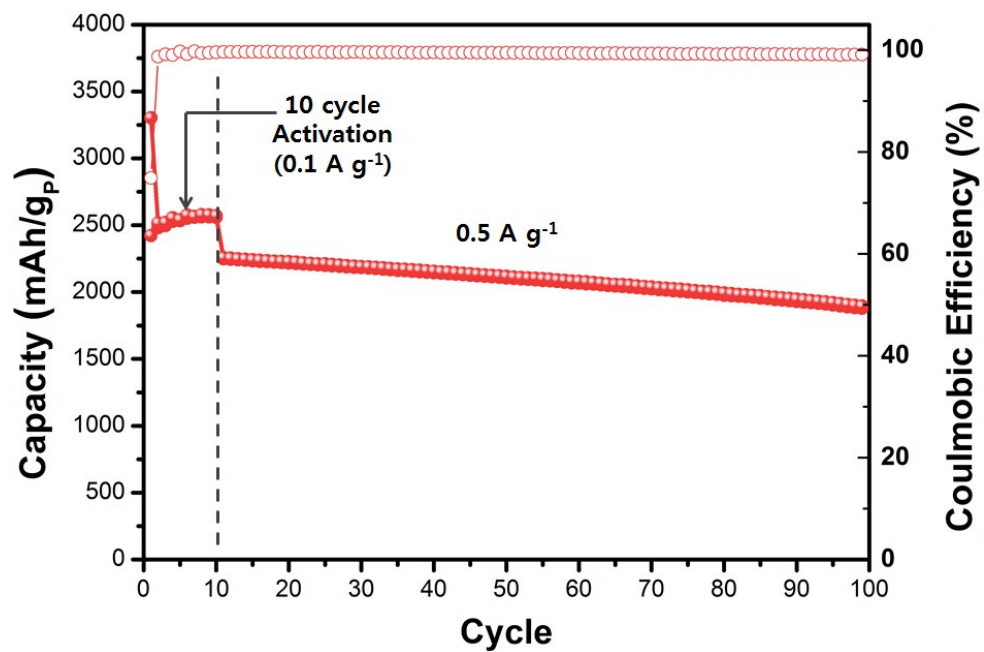

**Fig. S8** Cyclic performance of P/C@rGO at a high current density of 0.5 A g<sup>-1</sup>.

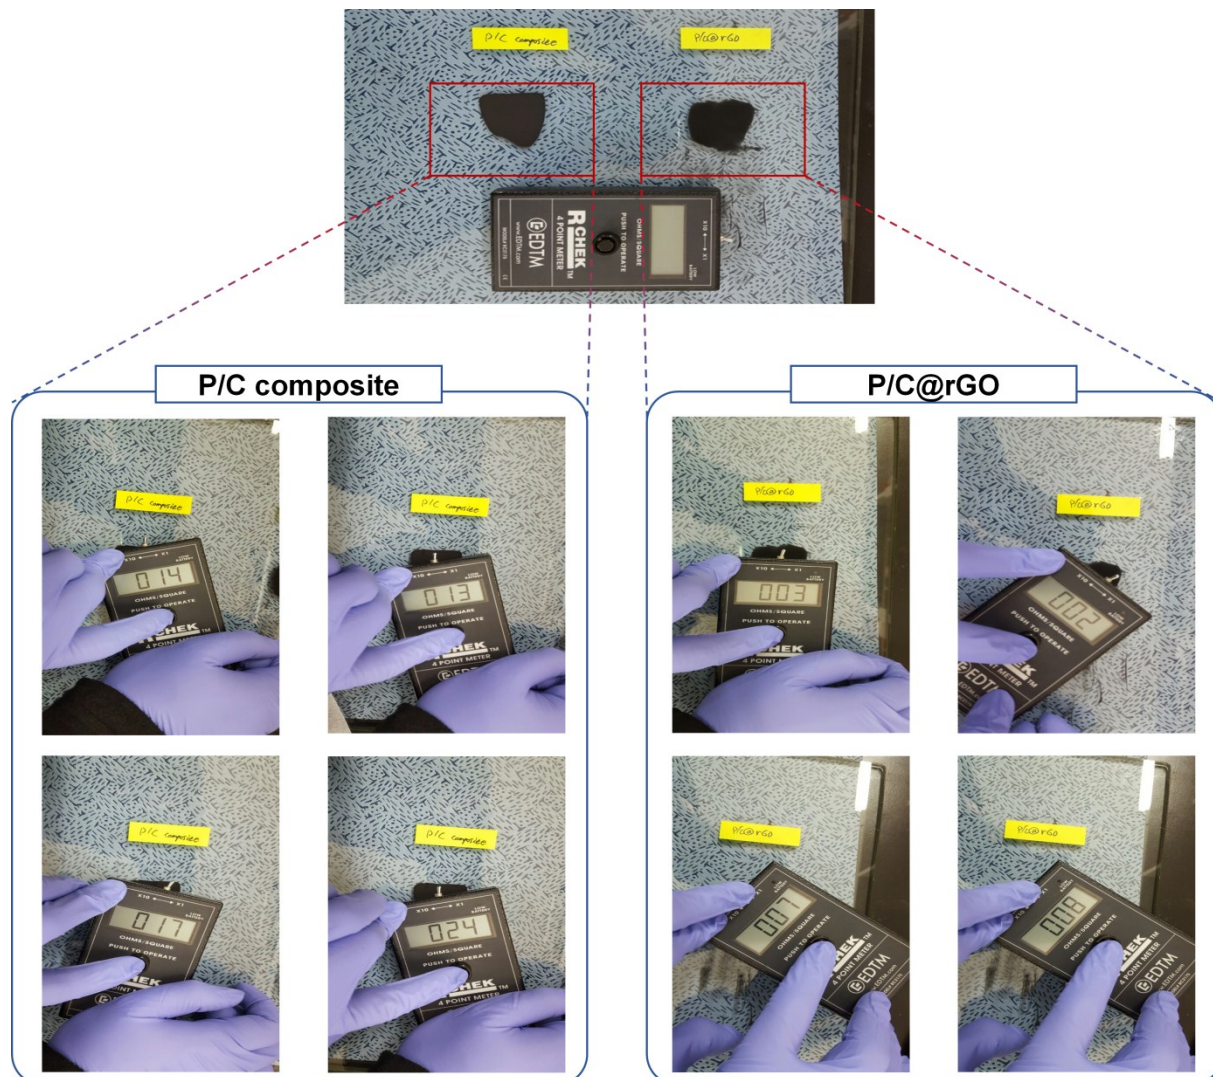

| Number of Measurement | P/C composite<br>( $\Omega \text{ sq}^{-1}$ ) | P/C@rGO<br>( $\Omega \text{ sq}^{-1}$ ) |
|-----------------------|-----------------------------------------------|-----------------------------------------|
| 1                     | 14                                            | 3                                       |
| 2                     | 13                                            | 2                                       |
| 3                     | 17                                            | 7                                       |
| 4                     | 24                                            | 8                                       |
| <b>Average</b>        | <b>17</b>                                     | <b>5</b>                                |

**Fig. S9** Sheet resistance comparison between P/C composite and P/C@rGO

---

$$Q_{P1} = \frac{Q_{P/C@rGO} - Q_C * W_C}{W_{P1}} \dots \dots \dots (1)$$

$$Q_{P2} = \frac{Q_{P/C \text{ composite}} - Q_C * W_C}{W_{P2}} \dots \dots \dots$$

(2)

---

$Q_{P1}$ ; Capacity contribution of phosphorus in P/C@rGO  
 $Q_{P2}$ ; Capacity contribution of phosphorus in P/C composite  
 $W_{P1}$ ; Weight ratio of phosphorus in P/C@rGO  
 $W_{P2}$ ; Weight ratio of phosphorus in P/C composite  
 $Q_C$ ; Specific capacity of Super P in P/C composite  
 $W_C$ ; Weight ratio of Super P in P/C composite

**Table S1** Calculation formulae for capacity normalization

| Active materials | Reversible Capacity (mAh g <sub>P</sub> <sup>-1</sup> ) / Retention rate | Reversible capacity (mAh g <sub>P/C</sub> <sup>-1</sup> ) | Reference |
|------------------|--------------------------------------------------------------------------|-----------------------------------------------------------|-----------|
| P/Super P        | 1142 at 140th cycle (100 mA g <sup>-1</sup> ) / 56%                      | 800 at 140th cycle (100 mA g <sup>-1</sup> )              | 11        |
| P/CNT            | 800 at 20th cycle (60 mA g <sup>-1</sup> ) / 28%                         | 500 at 20th cycle (60 mA g <sup>-1</sup> )                | 17        |
| P/Super P        | 1800 at 30th cycle (50 mA g <sup>-1</sup> ) / 93%                        | 1260 at 30th cycle (50 mA g <sup>-1</sup> )               | 18        |
| P/Graphene stack | 1700 at 60th cycle (100 mA g <sup>-1</sup> ) / 95%                       | -                                                         | 19        |
| P/3D-C           | 2500 at 160th cycle (200 mA g <sup>-1</sup> ) / 88%                      | 900 at 160th cycle (200 mA g <sup>-1</sup> )              | 20        |
| P/C@rGO          | 2015 at 100th cycle (100 mA g <sup>-1</sup> ) / 95%                      | 500 at 100th cycle (100 mA g <sup>-1</sup> )              | This work |

**Table S2** Comparison of reversible capacities of different P electrodes for SIBs.

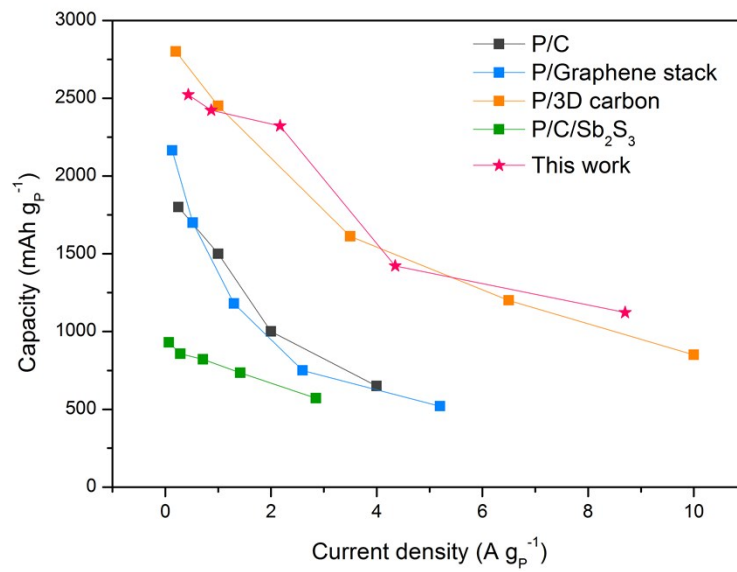

**Fig. S10** Rate capability comparison among different P electrodes for SIBs.

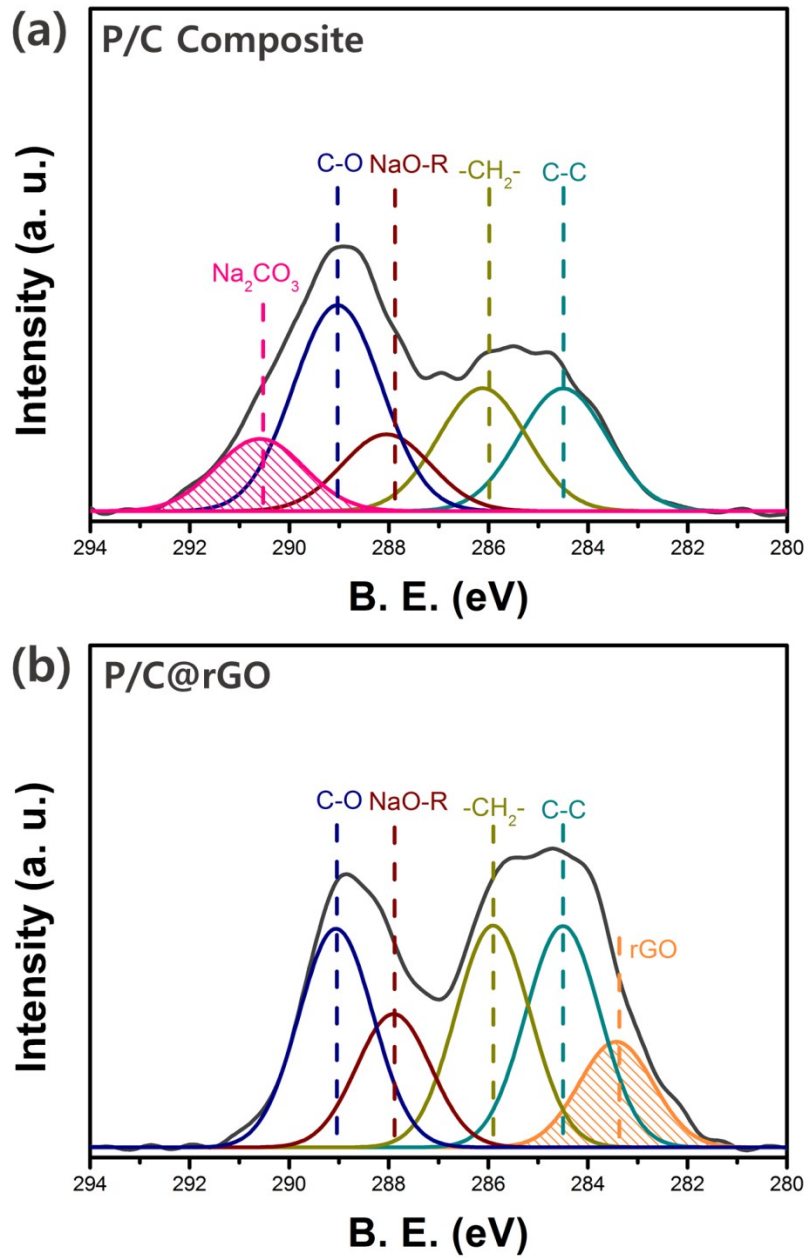

Fig. S11 Deconvolution of C 1s spectra after initial discharge to 0.01 V

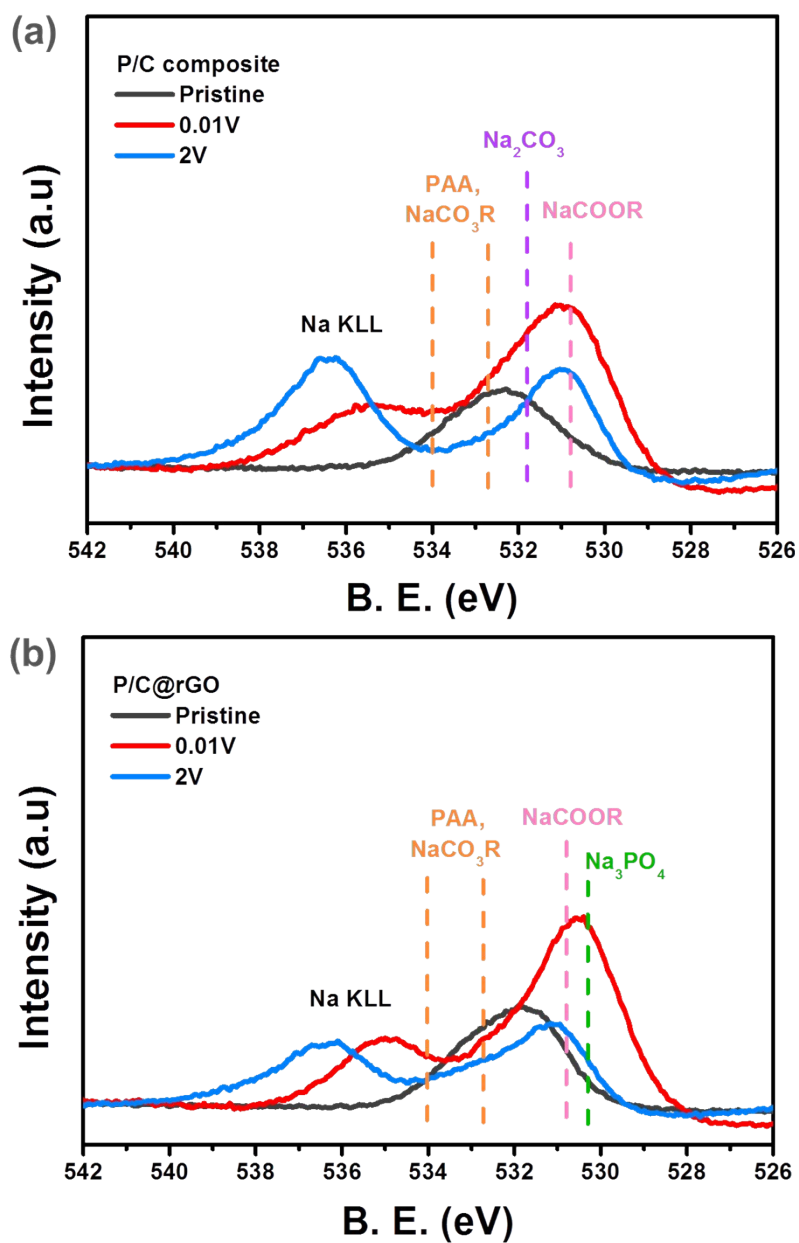

Fig. S12 O1s XPS spectra of (a) P/C composite and (b) P/C@rGO during 1<sup>st</sup> cycle.

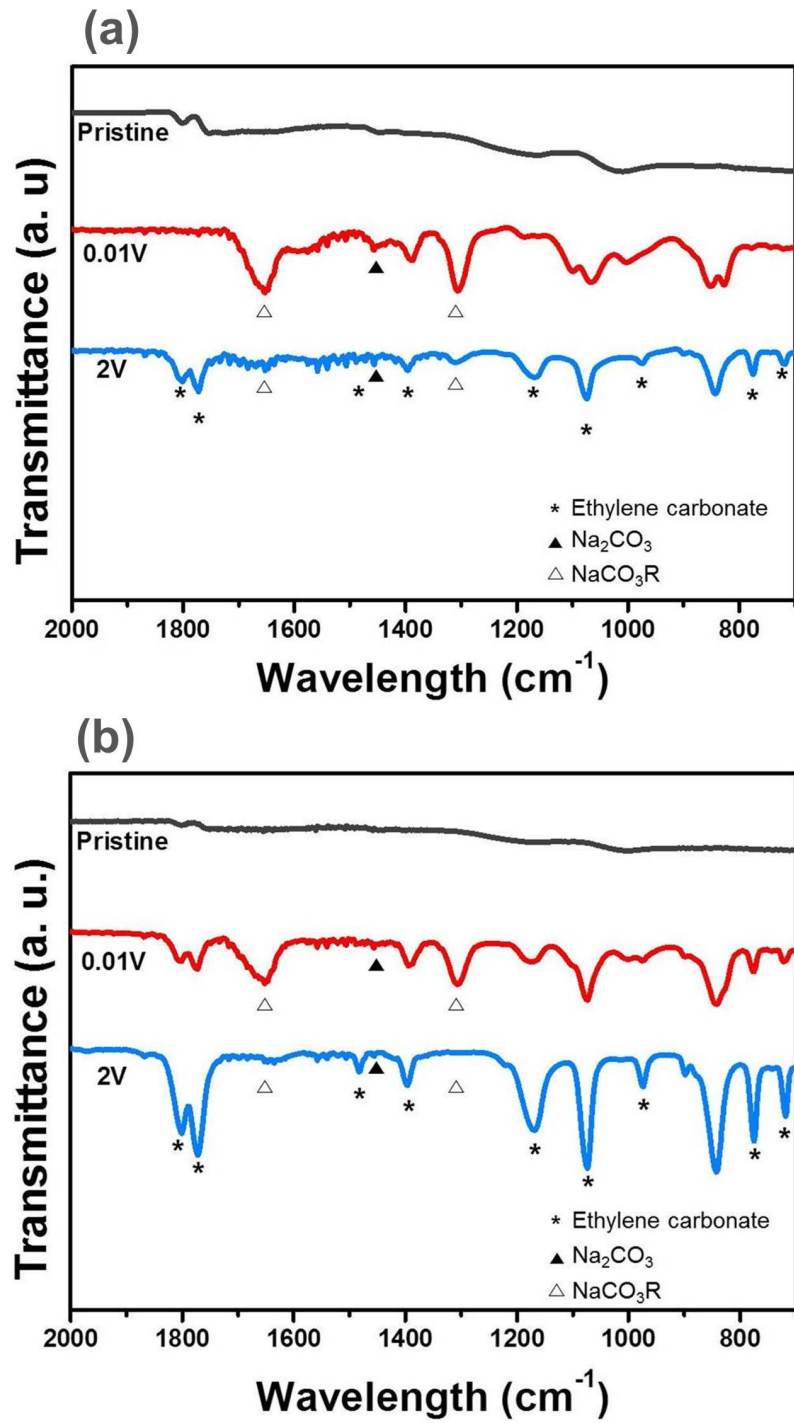

Fig. S13 Ex-situ FT-IR spectra of (a) P/C composite and (b) P/C@rGO.



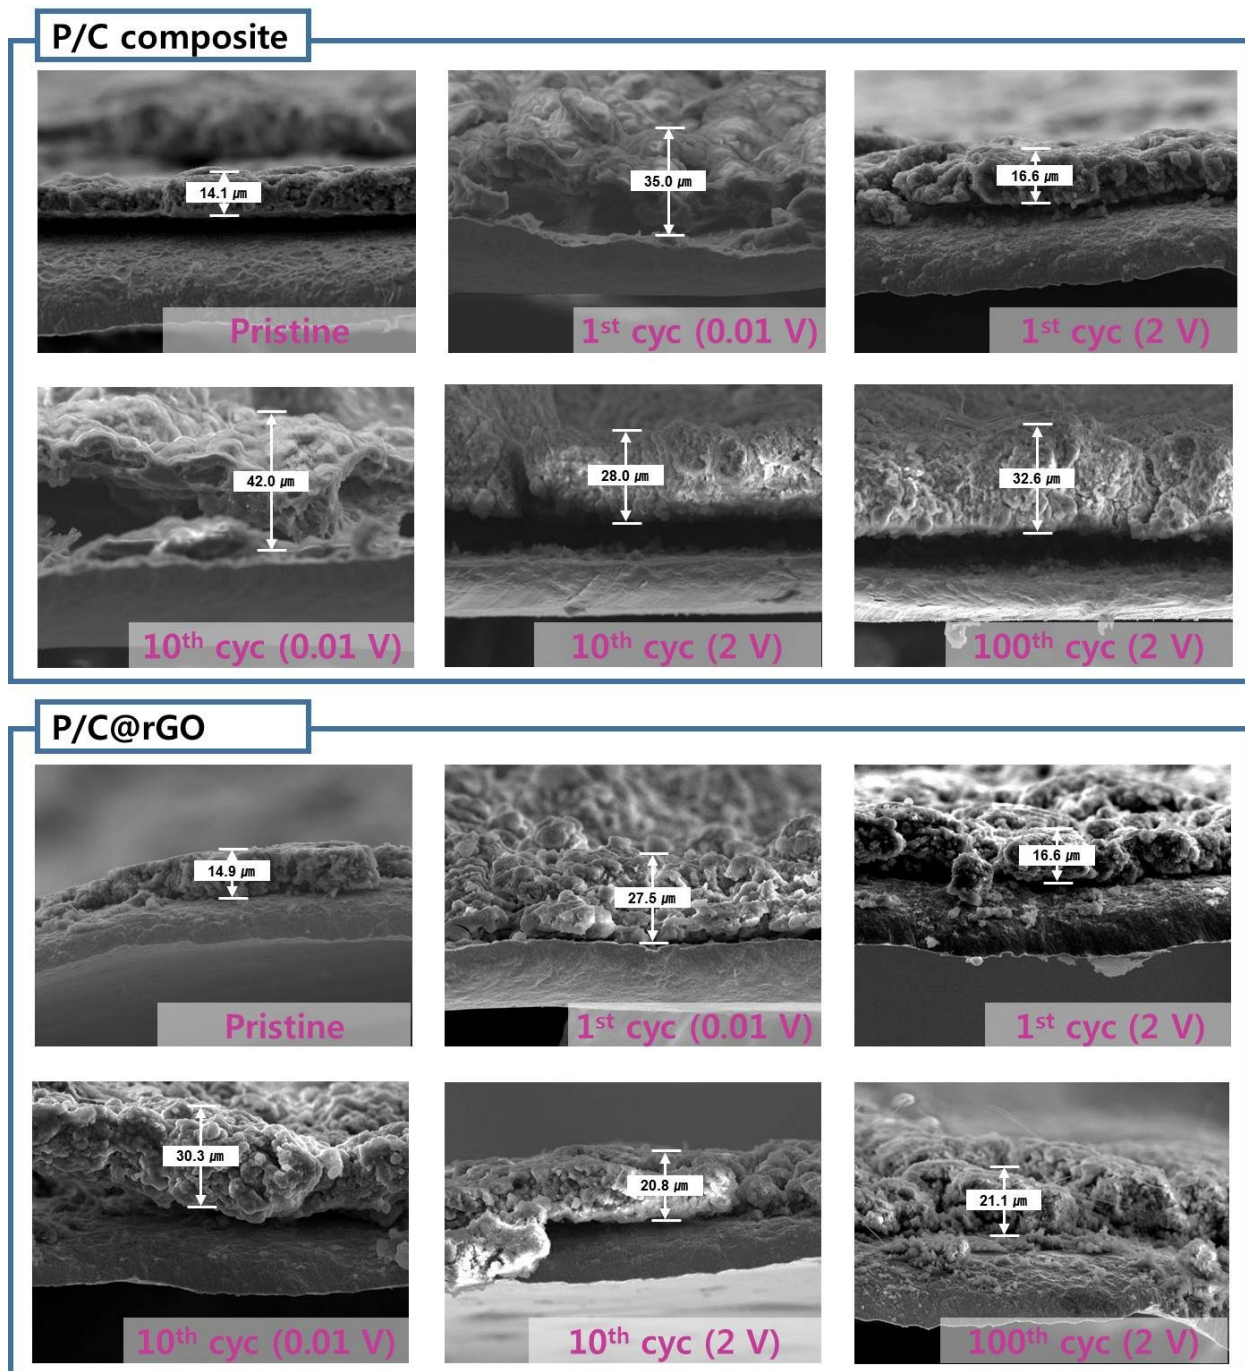

**Fig. S14** Cross section SEM images of P/C composite and P/C@rGO electrodes during cycling.
